# Supplementary material
Source: Springer Nature journal article supplement (https://www.springermedizin.de/resource/supplementary/13054_2011_527_MOESM2_ESM.pdf/9708594)

5180 potentially relevant citations were identified and screened  
1349 from Medline  
2521 from Embase  
1310 from EBM Reviews (Cochrane Database of Systematic Reviews/Central Register of Controlled Trials/Methodology Register, ACP Journal Club, DARE, Health Technology Assessment, NHS Evaluation Database)

4816 excluded based upon  
title and abstract

364 articles retrieved for further evaluation

275 articles excluded based upon abstract

89 articles retrieved for evaluation of full text

50 articles excluded based upon detailed evaluation  
- Not based upon RCTs  
- Did not describe costs/benefits  
- Did not describe in-patient prophylaxis

39 articles included in final review

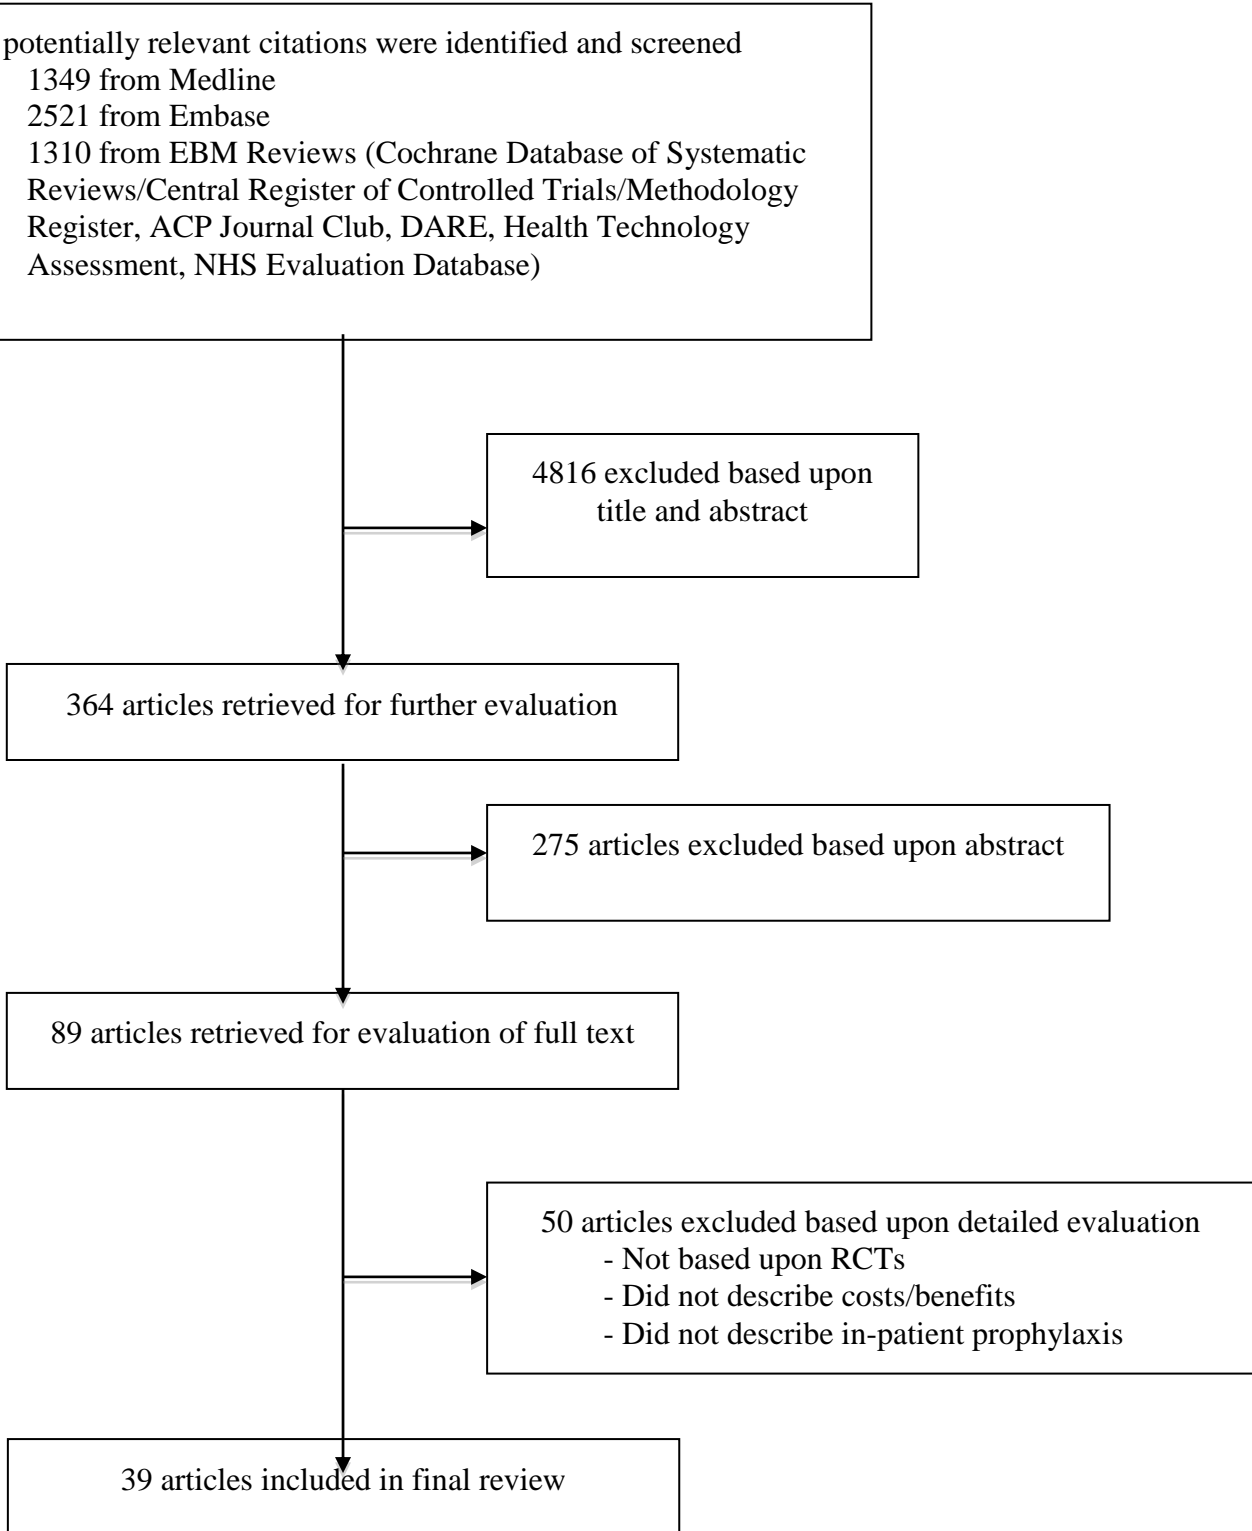

Supplement: MOESM2 [file 9708594]
